# Supplementary material
Source: PubMed Central journal article supplement (PMC2291429)
Supplement: mbc_E07-06-0594_1.pdf [file mbc_E07-06-0594_1.pdf]

**SUPPLEMENTAL MATERIAL**

**Figure S1. The *TBC1D3* locus is duplicated several times on chromosome 17.** (A) Snapshot adapted from the UCSC Genome Browser (<http://genome.ucsc.edu/>) showing the position of the *TBC1D3* loci found duplicated in chromosome 17. BAC clones position in the assembly and their accession numbers are shown; specific BACs containing the *TBC1D3* loci are highlighted in red, and their sequences are complete. Gene composition of the region is also provided. The possibility that these duplicated loci are the consequence of a wrong assembly of the human genome can be excluded for several reasons. Firstly, all copies of the *TBC1D3* gene are entirely contained in BAC clones whose sequences are complete. Four BACs contain two copies each of the *TBC1D3* gene, which represents the only common portion of sequence. Secondly, (B) two copies of the *TBC1D3* gene lay in a region of the chromosome 17 containing also the *CCL3* and *CCL4* genes, which also underwent several rounds of segmental duplication during evolution (Modi, 2004). Lastly, (C) a recent duplication of the *TBC1D3* ancestral locus that preceded a fusion event with a duplicated *USP32*, gene must be invoked to account for the generation of *USP6* (Paulding *et al.*, 2003). In line with this, *TBC1D3* duplicated locus at 17q23.2 (chr17:55440265-55451181) maps very closely to the *USP32* gene (~200 Kbp), suggesting that proximity of the two “ancestral genes” might have favored a recombination event during the evolution of chromosome 17 in the primate lineage.

**Figure S2. Exon and intron length conservation among the loci of *TBC1D3* and *RNTRE* from different organisms, and their protein products.**

(A) Exon and intron length of Human *TBC1D3* and *RNTRE*, and of Mouse and Xenopus *RNTRE*. Length of intron 5 and 6 of the Xenopus *RNTRE* locus cannot be assessed due to gaps in the genomic assembly. (B) Multiple alignment of the protein product of the above mentioned loci. ClustalX colors (reflecting the chemical properties of the aminoacids) are applied whenever group conservation exceeds 50%. GenBank protein accession numbers are as following: Hs\_RNTRE: AAH42943; Hs\_TBC1D3; NP\_115634; Mm\_RNTRE: BAC97847; Xt\_RNTRE: ORF predicted from mRNA CT030299.

**Figure S3. Quantification of colocalization between TBC1D3, GGA3 and ARFQ67L.**

The extent of colocalization of coexpressed proteins in the experiments shown in Fig. 6 B-C of the main manuscript is reported at the left of each image, and was monitored using ImageJ (<http://rsb.info.nih.gov/ij/>, Colocalization Threshold plugin). After fixing the threshold values for each channel, spatial correlation was calculated and colocalizing pixels highlighted in white. The tables report the Manders Coefficients (tM1 and tM2, corresponding to the indicated color-coded signals of the expressed proteins), calculated over intensities higher than the set threshold.

## REFERENCES

Modi, W.S. (2004). CCL3L1 and CCL4L1 chemokine genes are located in a segmental duplication at chromosome 17q12. *Genomics* 83, 735-738.

Paulding, C.A., Ruvolo, M., and Haber, D.A. (2003). The Tre2 (USP6) oncogene is a hominoid-specific gene. *Proc Natl Acad Sci U S A* 100, 2507-2511.

**A**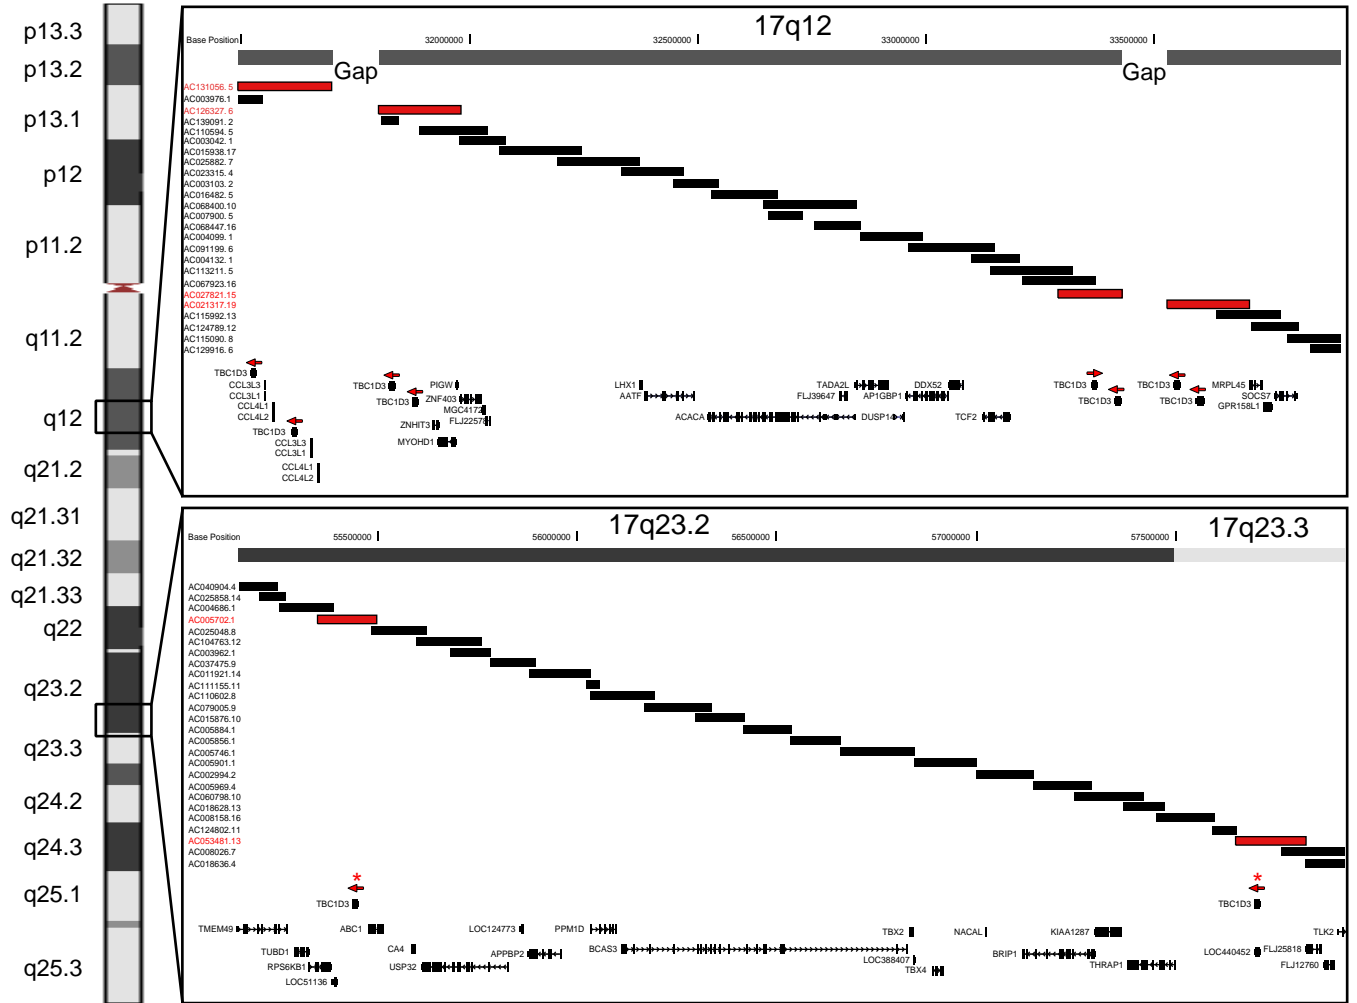**B**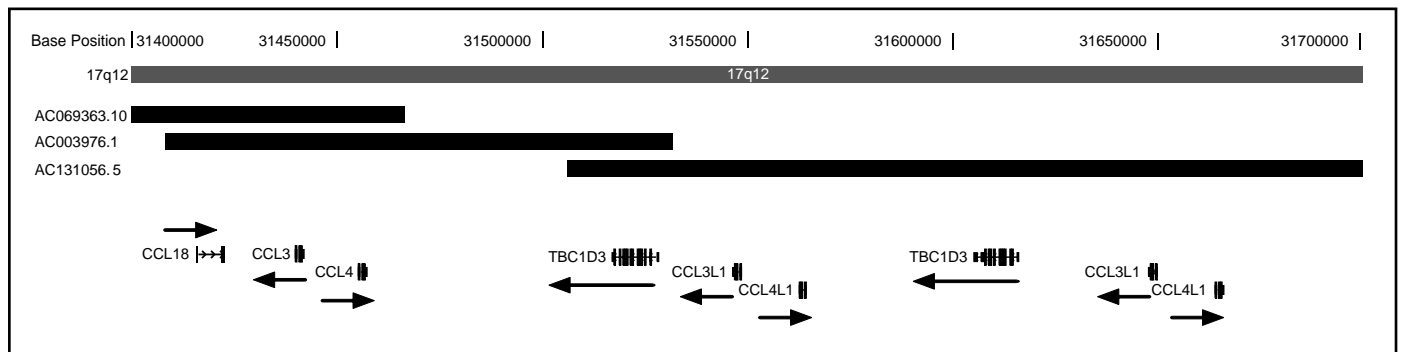**C**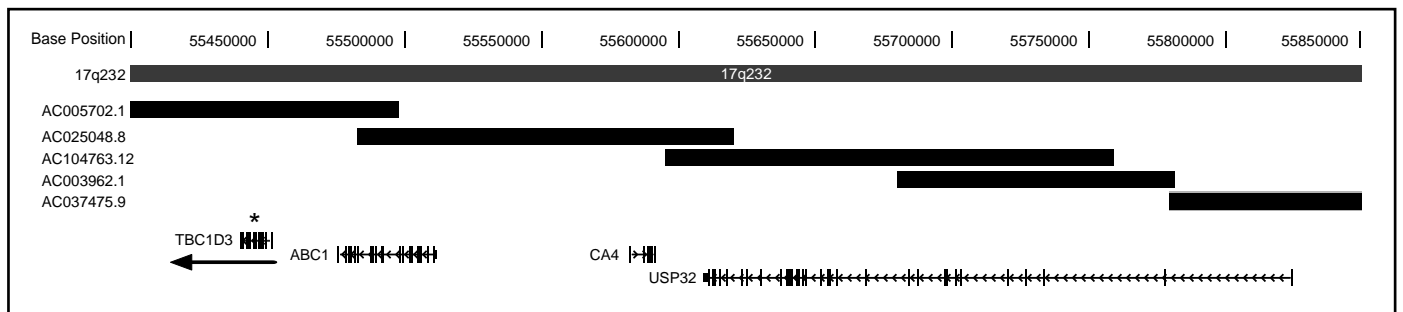**Figure S1**

**A**

| H. Sapiens <i>TBC1D3</i> locus, 10898 bp |             |               | H. Sapiens <i>RNTRE</i> locus, 149574 bp |             |               | M. Musculus <i>RNTRE</i> locus 120590 bp |             |               | X. tropic. <i>RNTRE</i> locus, 79268 bp |             |               |
|------------------------------------------|-------------|---------------|------------------------------------------|-------------|---------------|------------------------------------------|-------------|---------------|-----------------------------------------|-------------|---------------|
| Exon                                     | Exon length | Intron Length | Exon                                     | Exon length | Intron Length | Exon                                     | Exon length | Intron Length | Exon                                    | Exon length | Intron Length |
|                                          |             |               | 1                                        | 185         | 13725         | 1                                        | 50          | 13413         |                                         |             |               |
| 1                                        | 97          | 1428          | 2                                        | 87          | 70063         | 2                                        | 92          | 54596         | 1                                       | 59          | 30011         |
| 2                                        | 73          | 162           | 3                                        | 68          | 2031          | 3                                        | 68          | 3350          | 2                                       | 74          | 1007          |
| 3                                        | 86          | 1283          | 4                                        | 83          | 6811          | 4                                        | 83          | 5724          | 3                                       | 83          | 13679         |
| 4                                        | 40          | 482           | 5                                        | 40          | 8859          | 5                                        | 40          | 8609          | 4                                       | 40          | 1628          |
| 5                                        | 81          | 443           | 6                                        | 81          | 8386          | 6                                        | 81          | 5923          | 5                                       | 81          | n.a.          |
| 6                                        | 108         | 329           | 7                                        | 108         | 7872          | 7                                        | 108         | 5862          | 6                                       | 108         | n.a.          |
| 7                                        | 110         | 1255          | 8                                        | 110         | 2238          | 8                                        | 110         | 2409          | 7                                       | 110         | 384           |
| 8                                        | 49          | 543           | 9                                        | 49          | 1609          | 9                                        | 49          | 801           | 8                                       | 49          | 2664          |
| 9                                        | 121         | 713           | 10                                       | 121         | 3190          | 10                                       | 121         | 2502          | 9                                       | 121         | 1121          |
| 10                                       | 95          | 384           | 11                                       | 95          | 582           | 11                                       | 95          | 562           | 10                                      | 95          | 6196          |
| 11                                       | 66          | 463           | 12                                       | 66          | 98            | 12                                       | 66          | 94            | 11                                      | 66          | 2944          |
| 12                                       | 100         | 370           | 13                                       | 100         | 3048          | 13                                       | 100         | 2614          | 12                                      | 100         | 4671          |
| 13                                       | 153         | 981           | 14                                       | 153         | 17920         | 14                                       | 153         | 9782          | 13                                      | 153         | 8694          |
| 14                                       | 884         |               | 15                                       | 1797        |               | 15                                       | 3135        |               | 14                                      | 3945        |               |

**B**

|           |     |                                                                                                                            |     |
|-----------|-----|----------------------------------------------------------------------------------------------------------------------------|-----|
| Hs_RNTRE  | 1   | MN--DDQVALKLAQERAEIVAKYDRGREGAIEPWEADYLVYK-VDRDFGLHEEELFDHNAVERGRHLEIERITKWLKMLKWKERYKNTKPFERRIYKGIPLQLRGEVWALLLEIP        | 117 |
| Mm_RNTRE  | 1   | MN--DDQVALKLAQERAEIVAKYDRGREGAIEPWEADYLVYK-VDRDFGLHEEELPYHNAADRGRQLEIERITKWLKMLKWKERYKNTKPFERRIYKGIPLQLRGEVWALLLEIP        | 117 |
| Xt_RNTRE  | 1   | MNTEDDQASVRAAQRERAEIVAKYDRGREGAKIDPWEADFLLYK-VDRDFGLHKEELPIHDEVAQKQLLEIERITKWKVMKRSWDRYKNSKLEHRRRIYKGIPLQLRGEVWALLLEIVS    | 119 |
| Hs_TBC1D3 | 1   | MD--VVVAVASGAWAQRDEIDIMKYEGRHRAELPEDKGKPFRRYNNNVHLGIVHETLPELPIAREAKQIRRSISSKSKVMDLGDWEKYKSKRLLIDRAYKGMFNRRGEMMSVLLNTE      | 118 |
| Hs_RNTRE  | 118 | KMKEETRDLYSKLHFRAGCSFDIRQIDLDVNRTRFRDHIMFRDRYGVKQQSLFHVLAAYSIYNTYEVGYCGGMSQITALLLMYMNEDDAFWALVKLFSGPKHAMHGFFVQGFPKLLRFQEH  | 237 |
| Mm_RNTRE  | 118 | KMKEETRDLYSKLHFRAGCSFDIRQIDLDVNRTRFRDHIMFRDRYGVKQQSLFHVLAAYSIYNTYEVGYCGGMSQITALLLMYMNEDDAFWALVKLFSGPKHAMHGFFVQGFPKLLRFQEH  | 237 |
| Xt_RNTRE  | 120 | KLAEERKDLVLVLCQARRLSADIRQIDLDVNRTRFRDHIMFRDRYGVKQQALFHVLAAYSIYNTYEVGYCGGMSQITALLLMYMNEDDAFWALVKLFSGPKHAMHGFFVQGFPKLLRFQEH  | 239 |
| Hs_TBC1D3 | 119 | EMLKNLNGRQIMREKCKKSEHFKRIRDFVSGTLKHKIFFNDRYGTKRELLHILLAAEYNYEVGYGRDLHIAALFLLYLPEEADFWALVQLLASEHSLGQFHSNGGTVQGLDQ           | 238 |
| Hs_RNTRE  | 238 | HEKILNKFLSKLQHLDSOIEYTSFYTMKWFQCFPLDRTPPTLNRIRWIDYIFEGEVRTLTAMSYTILKHLKHLKMLKSMBELVEFFLOETLAKDFFPEDDFVIEQLQVSMTELKRAKRLDLP | 357 |
| Mm_RNTRE  | 238 | HEKILNKFLSKLQHLDSOIEYTSFYTMKWFQCFPLDRTPPTLNRIRWIDYIFEGEVRTLTAMSYTILKHLKHLKMLKSMBELVEFFLOETLAKDFFPEDDFVIEQLQVSMTELKRAKRLDLP | 357 |
| Xt_RNTRE  | 240 | HDRIILKFMFKLQHFETQELYTSFYTMKWFQCFPLDRTPPTLNRIRWIDYIFEGEVRTLTAMSYTILKHLKHLKMLKSMBELVEFFLOETLAKDFFPEDDFVIEQLQVSMTELKRAKRLDLP | 359 |
| Hs_TBC1D3 | 239 | QEHVYVATQPKMGMHQKDKLGCQSPGLCLIRILLDIGLGLTLRLWVYLVGEQALMLETIRIAFKVQKRLTNTRCGEWARFCNRFVDTWARDIEDVLKHLRASMKKLTKKKGLDF         | 358 |
| Hs_RNTRE  | 358 | EPGKEDEYPKKPLGLQPPLEQSGWVHHLNGQRSVGRSPFLASGRRESGAPHRREKSPHEQSTGTGTPER-AQEPERRASVEEEKLKLDEADFOFKLSEGE-QDSFRQYNHAAAANSNSA    | 475 |
| Mm_RNTRE  | 358 | EPGKEDEYPKKPLGLQPPLEQSGWVHHLNGQRSVGRSPFKTSSRNEDGSPKKNHESPVHHSNNGTPEP-AGQSRNASVDEGSKNLHRAEASQKFKSPGM-QDSFRHYNHAAAANSNSA     | 473 |
| Xt_RNTRE  | 360 | PPKDEEFPKPLGLQIPPEPQPTLVLNHVNGRTRHRLPQVKSDYSPSPSLLHNSNNRNOQKNSMEXENLKMKAQGHASRFQNKVEIYRYSDDYSLNKGDKLYNHAANNSNSA            | 479 |
| Hs_TBC1D3 | 359 | PPAK--PPCGSASREVPARGGKTLCKDHRQAPPPPE-----ARFPRFLNSASPPRAPSSSTLCP-----GGAVEDTIVFGTGVGPF                                     | 435 |
| Hs_RNTRE  | 476 | TSIRKREFEVKNWKEFSDVSAETRTAKYITMECKGRAAHFALAVTVPGEAEVRSVNRPKMKALDAEDGKRGTSASQYDINVPVGGESASVSEALERAYSQSERHALYPPSPR-KHAEFSS   | 594 |
| Mm_RNTRE  | 474 | ISNRKREFMKWRKPSDASAIEFTTKYAVCKSHSALPALEVALGSAETRLNENSGQMMLDGGCKRGNASQYDINVPVGGESASVSEALERAYSQSERHALYPPSPR-KHAEFSS          | 583 |
| Xt_RNTRE  | 480 | TPASAGSITLWKMSPEE-KNLDLLNIAECKGKPEDNANALQTSQAVI----VQKSRVDTE-CGRKSNASLDVAVPGE-----DSENTDENRHSSDSFTFRNTVYSTTASENPSKGS       | 590 |
| Hs_TBC1D3 | 436 | HALAGGGGQSGNHFQWNNMELRFTLDDVGE-----PWRHYDPRQSCWVRALSGPD-----                                                               | 487 |
| Hs_RNTRE  | 595 | SPSKVSN--KFTFKVQPPSHARYSPSLDGEARGLAHPPSYSNPPVYHGNSPKHFFPTANSPFASPOFSPGTDLNPSRRRPHGSLTYSVA--PEKYSRSPSPVLVPSRIEVLVDTGAGGY    | 710 |
| Mm_RNTRE  | 584 | SPPKVSN--KFTFKVQPPSHVRYPPQLPEEDHRAAYPPSYSNPPVYHGNSPKHVFPTAHGFGVSTQISPRPQINPSRRRPHGSLTYSVDS--PEKYSRSPSPVLVPSRIEVLVDTGAGGY   | 699 |
| Xt_RNTRE  | 591 | SPSLSSENSIVFVHSPHSHVQIQEEDDVFSIKQPPPIYSNPPYIYENS---VTKPHE---FOYSRINLMSPSKRSYVQSFRLPPDKMPSANITATQYNTVTSFHRIEVLVPADESATL     | 703 |
| Hs_TBC1D3 | 488 | -----QLACQWAEHFAERVRSFAAPSTSDQGFPRARDE-----QCAPISGRCCLGLHLESQFFPGE-----                                                    | 549 |
| Hs_RNTRE  | 711 | SGNSGSPKNGKLIIPVDYLPNRTMSEVSYTYRETCGQSWTRDAHS---ENLPKYSAFQLAFFDHLGLFAVSVDPVRYKMSAAEDASGSPGYVSGPPPPAYHYRN-RDGLSIQSSV        | 826 |
| Mm_RNTRE  | 700 | SSSGSKNGQILIPVDYLPENRKNSEVSYTYRETCGQSWTRDAHS---ENLPKYSAFQLAFFDHLGLFAVSVDPVRYKMSAAEDASGSPGYVSGPPPPAYHYRN-RDGLSIQSSV         | 817 |
| Xt_RNTRE  | 704 | LSSFNQKNSQVILIPVDYHTHTFPPDAAPG---FICGPLNREVSQSYLSSLQKSENLPSTGCHYNTSSVSAISVRLRITSRSNKNPELQYLVSTSGATQFFRNPFDGIIMHESV         | 819 |

**Figure S2**

ARF6-Q67L + TBC1D3

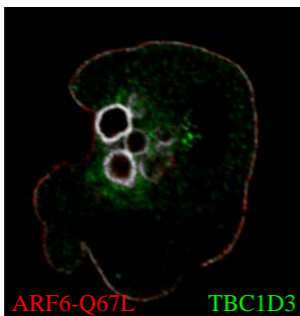

ARF6-Q67L

TBC1D3

|     |        |
|-----|--------|
| tM1 | 0.6764 |
| tM2 | 0.5285 |

ARF6-Q67L + GGA3

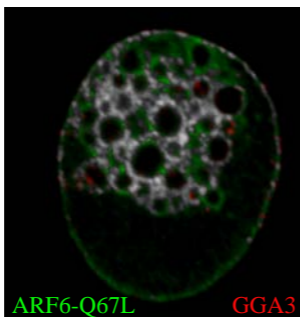

ARF6-Q67L

GGA3

|     |        |
|-----|--------|
| tM1 | 0.9295 |
| tM2 | 0.7087 |

TBC1D3 + GGA3

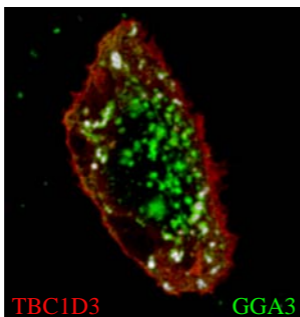

TBC1D3

GGA3

|     |        |
|-----|--------|
| tM1 | 0.1948 |
| tM2 | 0.2040 |

ARF6-Q67L +  
TBC1D3 + GGA3

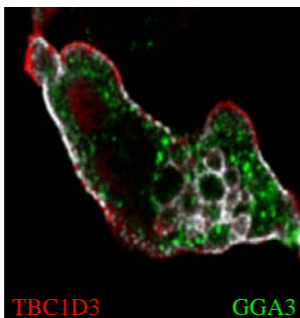

TBC1D3

GGA3

|     |        |
|-----|--------|
| tM1 | 0.8557 |
| tM2 | 0.8438 |

Figure S3
